# Supplementary material
Source: MDPI journal article supplement (https://www.mdpi.com/1999-4907/14/5/873)
Supplement: s1 [file s1]

**Table S1.** Characteristics of species recovery at the experimental quadrats

| Species and site                      | Experiment season | Kerosene exposure dose (g/kg)                                                                            |                                                                                                                                               |                                                                              |                                                                                                                                                                          |                                                                                                      |
|---------------------------------------|-------------------|----------------------------------------------------------------------------------------------------------|-----------------------------------------------------------------------------------------------------------------------------------------------|------------------------------------------------------------------------------|--------------------------------------------------------------------------------------------------------------------------------------------------------------------------|------------------------------------------------------------------------------------------------------|
|                                       |                   | 1                                                                                                        | 5                                                                                                                                             | 10                                                                           | 25                                                                                                                                                                       | 100                                                                                                  |
| <i>Athyrium filix-femina</i> (forest) | 1                 | -                                                                                                        | -                                                                                                                                             | -                                                                            | -                                                                                                                                                                        | -                                                                                                    |
|                                       | 2                 | 1 new individual in one of the quadrats                                                                  | -                                                                                                                                             | -                                                                            | -                                                                                                                                                                        | -                                                                                                    |
|                                       | 3                 | -                                                                                                        | 1-3 new individuals in the quadrat                                                                                                            | 1-3 new individuals in the quadrat                                           | 1-3 new individuals in the quadrat                                                                                                                                       | -                                                                                                    |
| <i>Ajuga reptans</i> (forest)         | 1                 | -                                                                                                        | -                                                                                                                                             | -                                                                            | -                                                                                                                                                                        | -                                                                                                    |
|                                       | 2                 | Beginning of vegetative colonization by individuals at the periphery of 1 of 3 quadrats                  | -                                                                                                                                             | -                                                                            | Vegetative colonization by individuals at the periphery (2 of 3 quadrats)                                                                                                | Vegetative colonization by individuals at the periphery (2 of 3 quadrats)                            |
|                                       | 3                 | Beginning of vegetative colonization by individuals at the periphery of 2 of 3 quadrats                  | Beginning of vegetative colonization by individuals at the periphery of 2 of 3 quadrats; 1 individual of generative origin in 1 of 3 quadrats | Vegetative colonization by individuals at the periphery (2 of 3 quadrats)    | Numerous high coverage individuals in 1 of 3 quadrats, site vegetative colonization at 1 of 3 quadrats, start of vegetative colonization at periphery of 1 of 3 quadrats | Numerous high coverage individuals (2 of 3 quadrats), site vegetative colonization (1 of 3 quadrats) |
| <i>Ledum palustre</i> (bog)           | 1                 | Minor discoloration of part of the leaves                                                                | Partial yellowing/browning of the leaves                                                                                                      | Partial yellowing/browning of the leaves                                     | Partial yellowing/browning of the leaves                                                                                                                                 | Partial defoliation and partial yellowing/browning of leaves                                         |
|                                       | 2                 | No change                                                                                                | Refoliation                                                                                                                                   | Refoliation (2 of 3 quadrats); Partial defoliation (1 of 3 quadrats)         | Partial defoliation at 2 of 3 quadrats, more severe defoliation at 1 of 3 quadrats                                                                                       | More severe defoliation                                                                              |
|                                       | 3                 | Partial defoliation                                                                                      | No change                                                                                                                                     | Noticeable defoliation                                                       | Refoliation                                                                                                                                                              | No change                                                                                            |
| <i>Chamaedaphne calyculata</i> (bog)  | 1                 | Minor discoloration of part of the leaves                                                                | Partial yellowing/browning of the leaves                                                                                                      | Partial yellowing/browning of leaves, partial defoliation                    | Partial yellowing/browning of leaves, partial defoliation                                                                                                                | Severe defoliation, partial yellowing/browning of leaves                                             |
|                                       | 2                 | Growth of new shoots                                                                                     | Growth of new shoots                                                                                                                          | Growth of new shoots                                                         | Growth of new shoots                                                                                                                                                     | Partial refoliation and regrowth of shoots                                                           |
|                                       | 3                 | Continued growth of new shoots                                                                           | Continued growth of new shoots                                                                                                                | No change                                                                    | No change                                                                                                                                                                | No change                                                                                            |
| <i>Vaccinium oxycoccos</i> (bog)      | 1                 | Partial yellowing/browning of leaves and partial defoliation; regrowth of new shoots in some individuals | New shoot regrowth in some of the individuals in 2 of 3 quadrats                                                                              | New shoot regrowth in some of the individuals in 1 of 3 quadrats             | New shoot regrowth in some of the individuals in 1 of 3 quadrats                                                                                                         | -                                                                                                    |
|                                       | 2                 | No change                                                                                                | Start of colonization by creeping shoots at the periphery of 1 of 3 quadrats                                                                  | Start of colonization by creeping shoots at the periphery of 1 of 3 quadrats | -                                                                                                                                                                        | -                                                                                                    |
|                                       | 3                 | Partial regeneration of coverage through the growth of new shoots                                        | Start of colonization by creeping shoots at the periphery of 2 of 3 quadrats                                                                  | Start of colonization by creeping shoots at the periphery of 2 of 3 quadrats | Start of colonization by creeping shoots at the periphery of 1 of 3 quadrats                                                                                             | Start of colonization by creeping shoots at the periphery of 1 of 3 quadrats                         |
| <i>Eriophorum vaginatum</i> (bog)     | 1                 | New leaf growth in some of the individuals                                                               | -                                                                                                                                             | -                                                                            | -                                                                                                                                                                        | -                                                                                                    |
|                                       | 2                 | 1-3 new individuals in 1 of 3 quadrats                                                                   | -                                                                                                                                             | -                                                                            | -                                                                                                                                                                        | -                                                                                                    |
|                                       | 3                 | 1-3 new individuals in 1 of 3 quadrats; more than 3 individuals in 1 of 3 quadrats                       | 1 new individual in 1 of 3 quadrats                                                                                                           | 1-3 new individuals in 2 of 3 quadrats                                       | -                                                                                                                                                                        | -                                                                                                    |

Note: A dash (-) indicates total mortality in the first season and no recovery in the second and third seasons

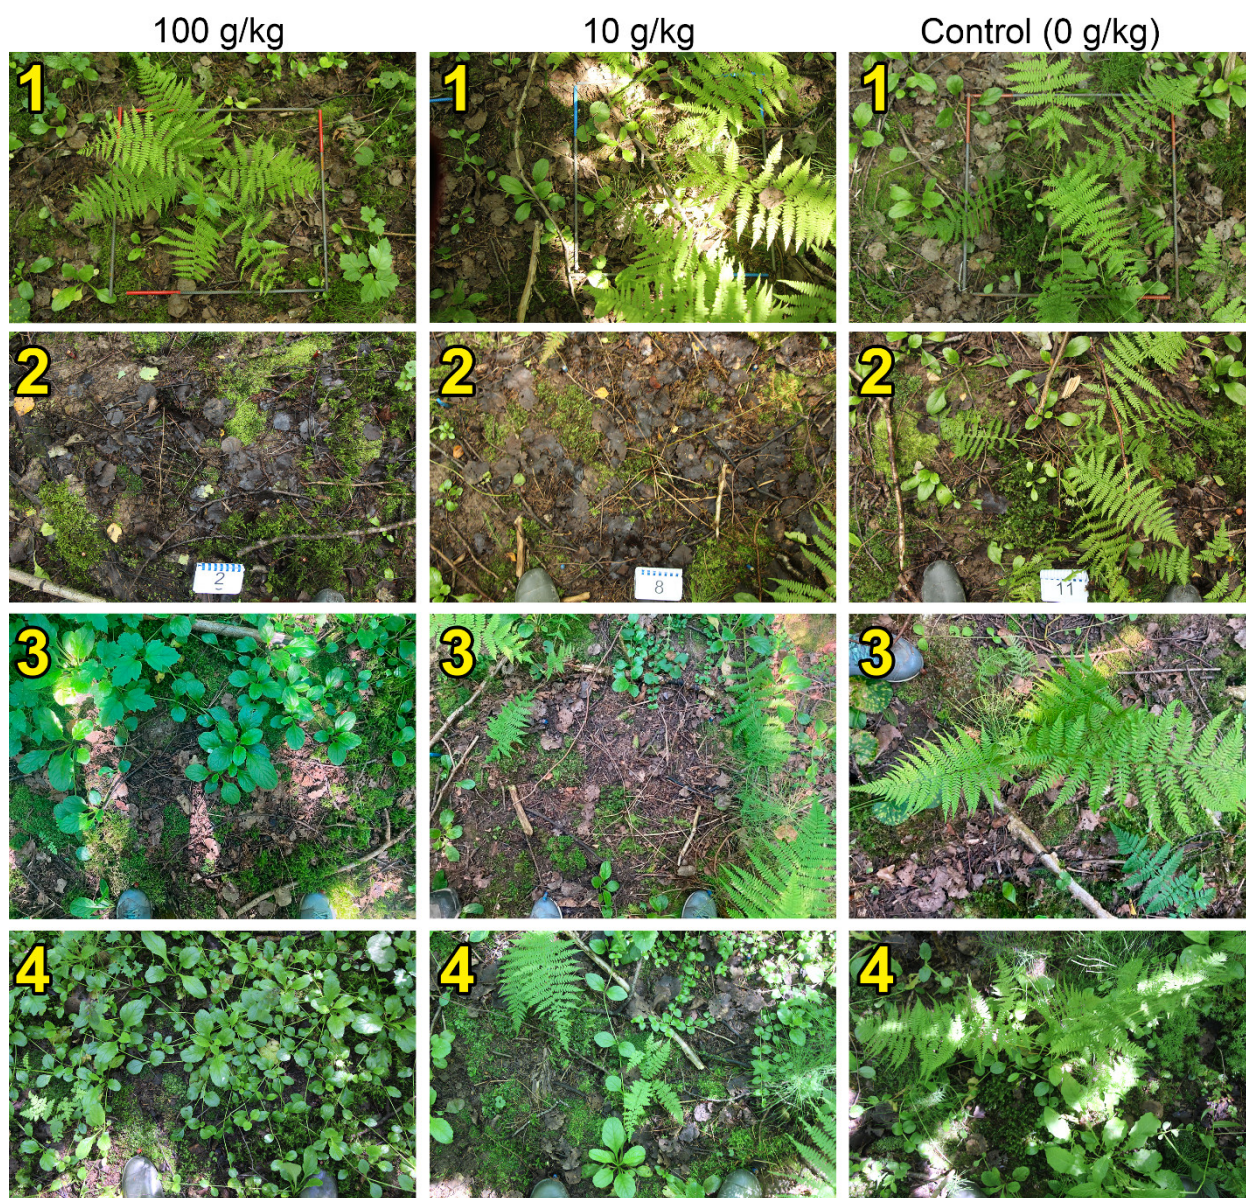

**Figure S1.** Dynamics of plants condition in experimental quadrats in forest community at maximum kerosene doses (100 g/kg), average doses (10 g/kg) and control: 1 – before treatment; 2 - first vegetation season (1 month after application); 3 - second vegetation season (1 year after application); 4 - third vegetation season (2 years after application).



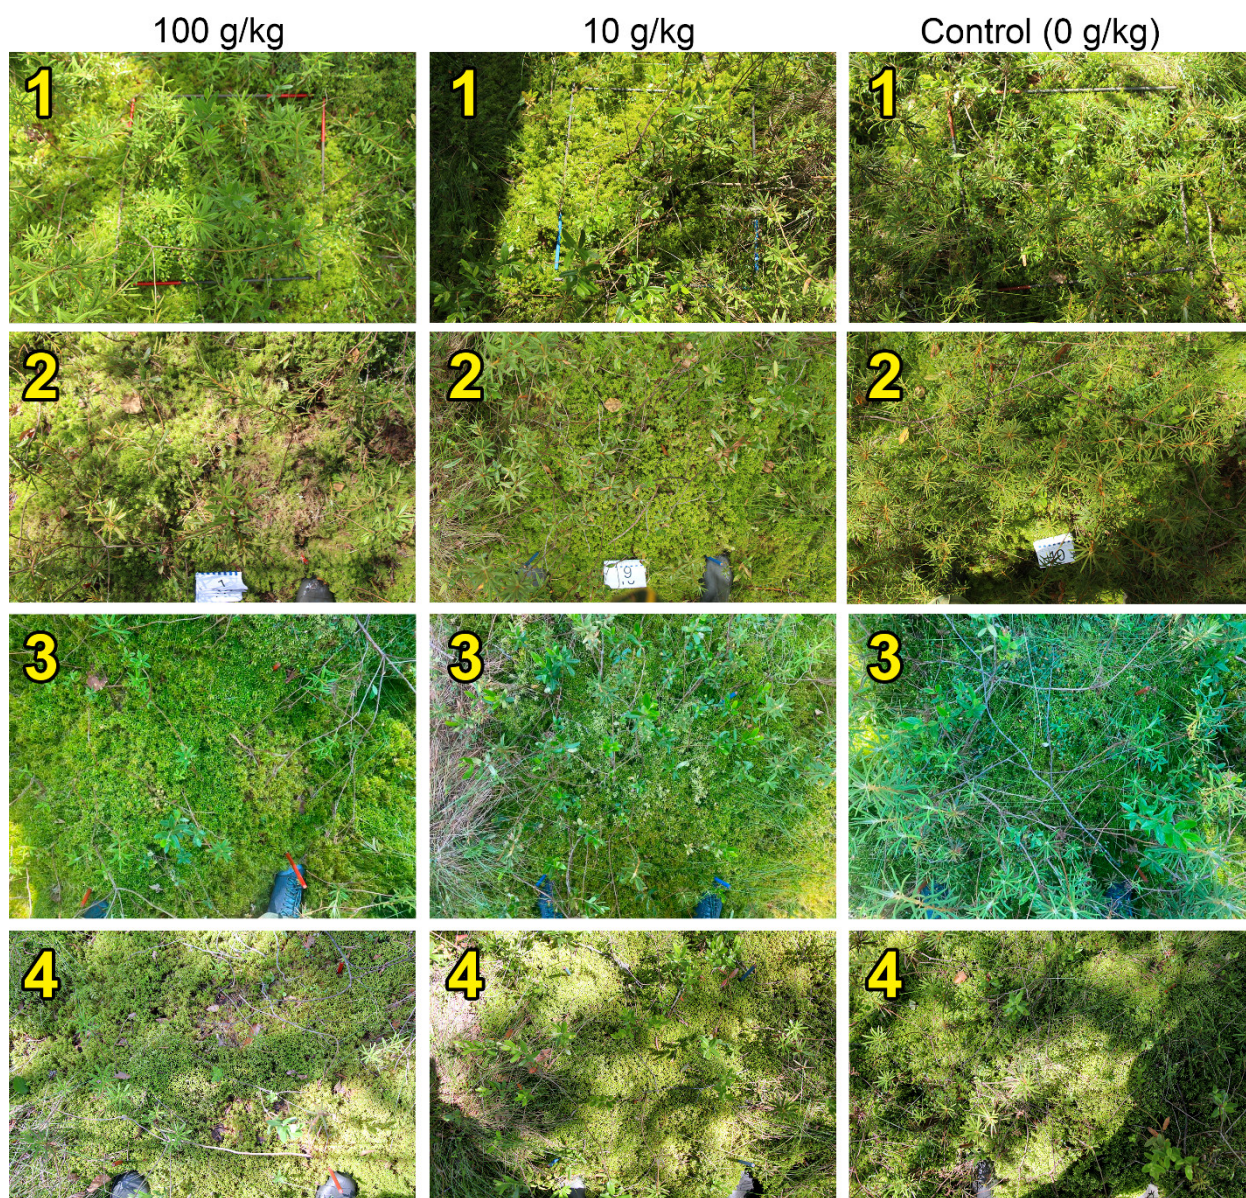

**Figure S2.** Dynamics of plants condition in experimental quadrats in bog community at maximum kerosene doses (100 g/kg), average doses (10 g/kg) and control: 1 – before treatment; 2 - first vegetation season (1 month after application); 3 - second vegetation season (1 year after application); 4 - third vegetation season (2 years after application).
